# Supplementary material for: Emerging investigators series: microbial communities in full-scale drinking water distribution systems – a meta-analysis
Source: Royal Society of Chemistry journal article supplement (doi:10.1039/c6ew00030d), 2016-01-01

Table S1. Summary of datasets used in this study

| No | DOI number for paper              | Publication year | Disinfectant residual type | Country of sampling | Sampling points   | Sequencing instrument           | Hypervariable region amplified | Reference number | Number of treatment plants | Average % of matches in SILVA database |
|----|-----------------------------------|------------------|----------------------------|---------------------|-------------------|---------------------------------|--------------------------------|------------------|----------------------------|----------------------------------------|
| 1  | 10.1016/j.watres.2015.12.010      | 2015             | Chlorinated                | UK                  | POU               | Illumina Miseq                  | V4                             | 15               | 1                          | 89.02% ± 3.79%                         |
| 2  | doi: 10.1016/j.watres.2014.01.049 | 2014             | Chlorinated                | UK                  | DWDS              | Roche 454 FLX                   | V1-V3                          | 28               | 1                          | 71.15% ± 6.22%                         |
| 3  | 10.1016/j.watres.2013.11.027      | 2014             | Chlorinated/Chloraminated  | USA                 | POU               | Roche 454 FLX Titanium          | V1-V2                          | 32               | 15                         | 79.69% ± 12.42%                        |
| 4  | 10.1016/j.ecoenv.2014.07.029      | 2014             | Chlorinated                | China               | DWTP outlet, POU  | Roche 454 FLX Titanium          | V3-V4                          | 37               | 1*                         | 61.61% ± 12.48%                        |
| 5  | 10.1128/AEM.01892-12              | 2012             | Chlorinated/Chloraminated  | USA                 | DWDS              | Roche 454 FLX Titanium          | V4-V5                          | 33               | 1                          | 89.56% ± 3.88%                         |
| 6  | 10.1371/journal.pone.0141087      | 2015             | Chlorinated/Chloraminated  | USA                 | DWTP outlet, POU  | Illumina Miseq                  | V4                             | 34               | 5                          | 67.2% ± 8.08%                          |
| 7  | 10.1021/acs.est.5b03521           | 2015             | Chlorinated                | China               | DWTP outlet, POU  | Roche 454 FLX Titanium          | V1-V3                          | 38               | 1*                         | 85.28% ± 8.29%                         |
| 8  | 10.1016/j.watres.2013.10.071      | 2013             | Chlorinated                | China               | DWTP outlet       | Roche 454 FLX                   | V1-V3                          | 10               | 1                          | 96.92%                                 |
| 9  | 10.1021/es5009467                 | 2014             | No disinfectant residual   | Netherlands         | POU               | Roche 454 FLX Titanium          | V4-V6                          | 26               | 1**                        | 63.61% ± 4.24%                         |
| 10 | 10.1128/mBio.01135-14             | 2014             | Chloraminated              | USA                 | DWTP outlet, POU  | Roche 454 GS-FLX                | V4-V5                          | 7                | 1                          | 69.98% ± 21.13%                        |
| 11 | 10.1111/1462-2920.12739           | 2015             | No disinfectant residual   | Netherlands         | DWDS              | Illumina MiSeq/Roche 454 GS-FLX | V4 and V5-V6                   | 6                | 32**                       | 45.22% ± 6.65%                         |
| 12 | 10.1021/es502646d                 | 2014             | Chlorinated/Chloraminated  | USA                 | DWDS              | Illumina MiSeq                  | V4                             | 35               | 1                          | 68.93% ± 2.65%                         |
| 13 | 10.1007/s11274-013-1321-5         | 2013             | Chloraminated              | China               | DWTP outlet, POU  | Roche 454 GS-FLX                | V3-V5                          | 39               | 1                          | 29.91% ± 0.64%                         |
| 14 | 10.1128/AEM.01297-15              | 2015             | Chloraminated              | Australia           | DWTP outlet, DWDS | Ion Torrent                     | V3                             | 43               | 2                          | 90.24% ± 6.82%                         |

\*Both studies sampled at the same treatment plant

\*\*Plant from study No.9 may have been sampled in study No. 11

**Figure S1:** The number of samples retained (primary Y-axis, blue squares) with increasing subsampling depths and their corresponding Good's coverage (secondary Y-axis, red squares) is shown. A subsampling depth of 500 sequences per sample was chosen as this allowed for an average Good's coverage 0.8 while retaining maximum number of samples (142 out of 145) in the analyses.

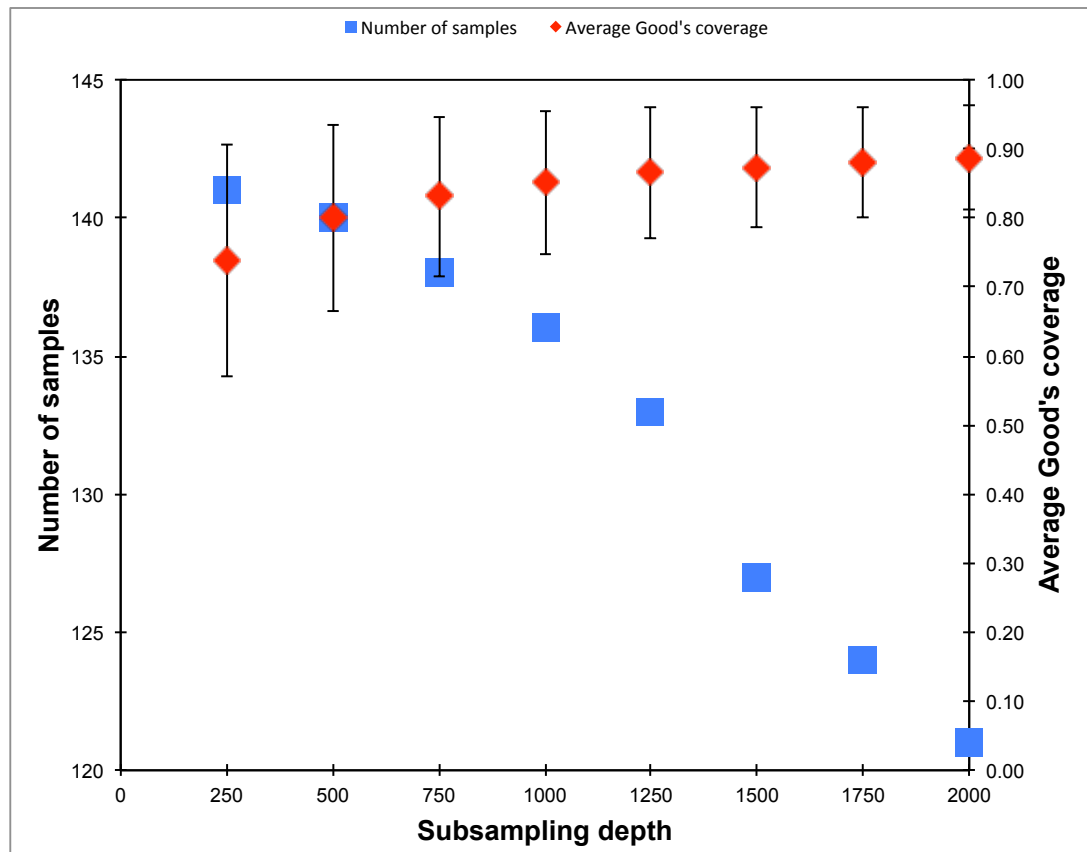

**Figure S2:** Workflow illustrating data collection, data processing and data analysis steps.

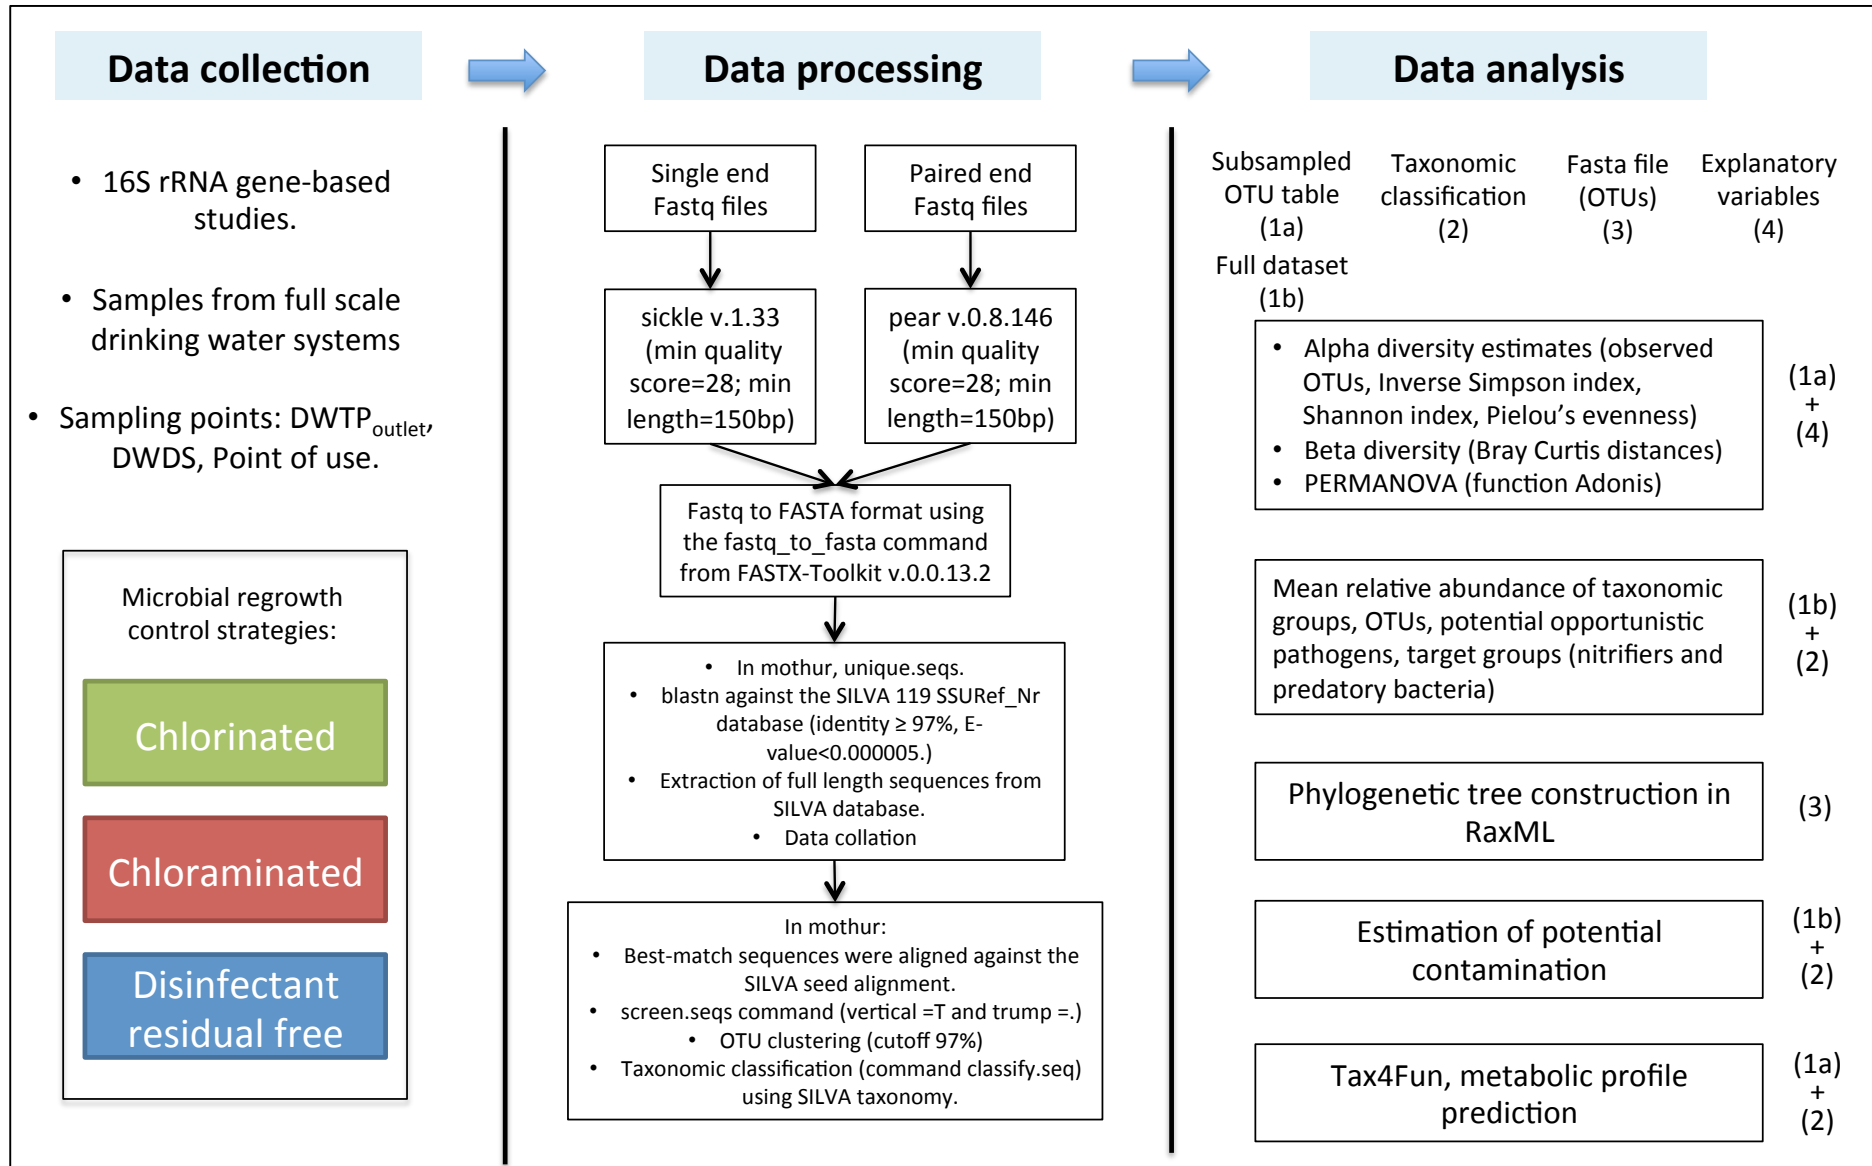

**Figure S3:** Heatmap of OTU abundance (OTUs with relative abundance >0.01% in the subsampled OTU table). Abundances were scaled with a Z-score transformation to improve visualization. The sampling location dendrogram was generated with Bray Curtis distances and UPGMA clustering method. Grouping information is indicated by the color legend (Chl: chlorinated, Chm: chloraminated, Drf: disinfectant residual-free).

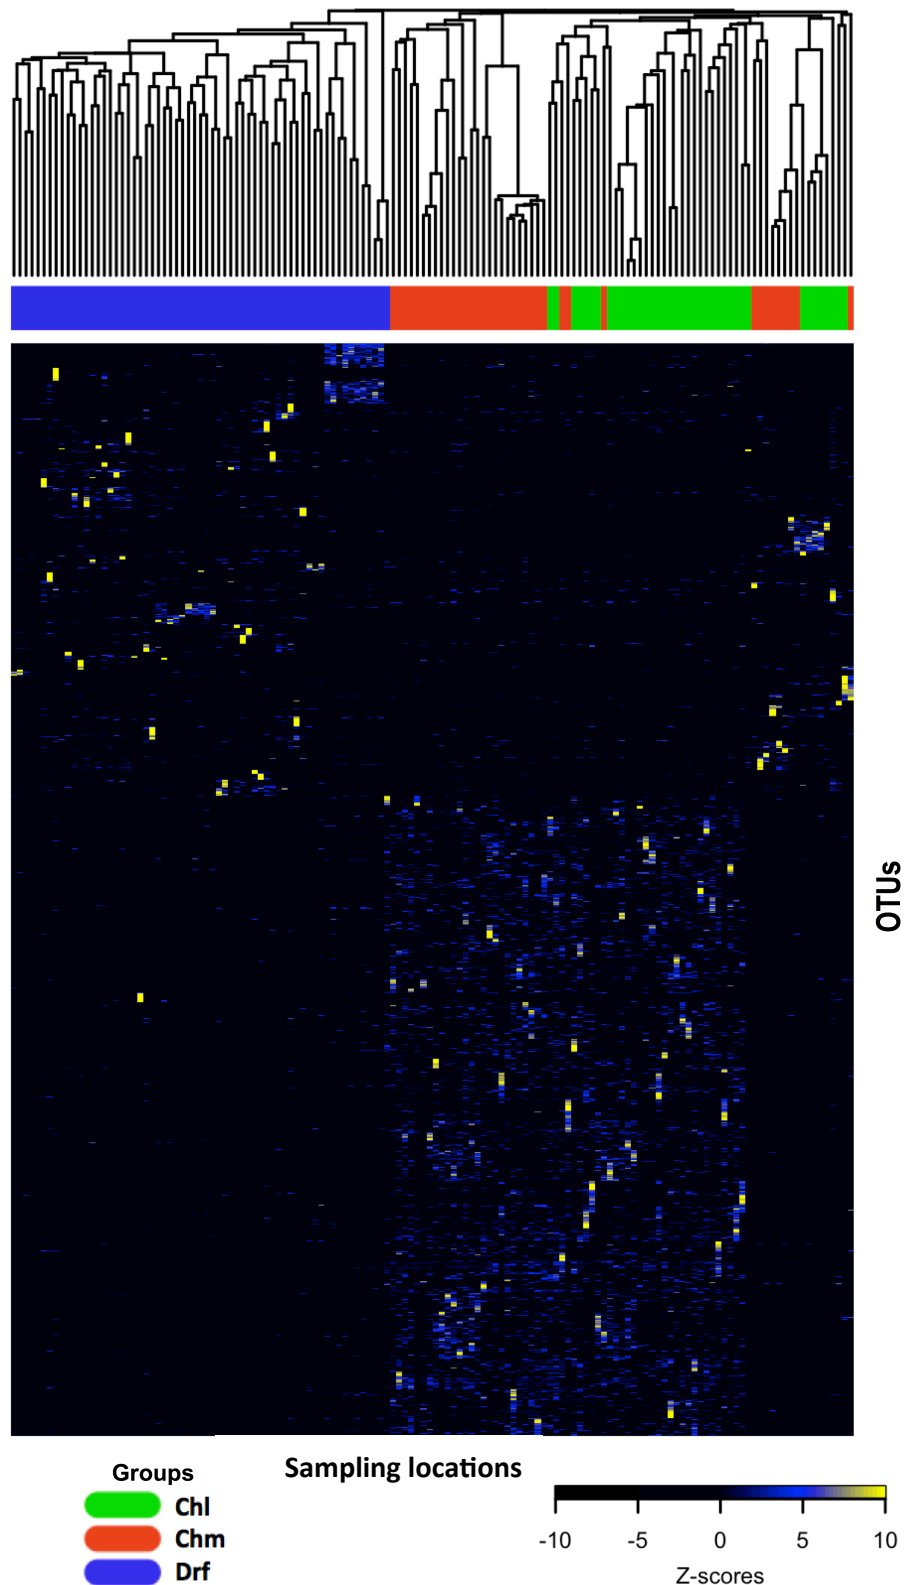

**Figure S4:** Dendrogram of sampling locations generated with Bray Curtis distances and UPGMA clustering method. Color legends indicate type of source water (SW: surface water; GW: groundwater; Mix: mixed source water including surface water, groundwater and desalinated seawater), and disinfection group (Chl: chlorinated, Chm: chloraminated, Drf: disinfectant residual-free). Reference numbers of each dataset are at the bottom of the plot.

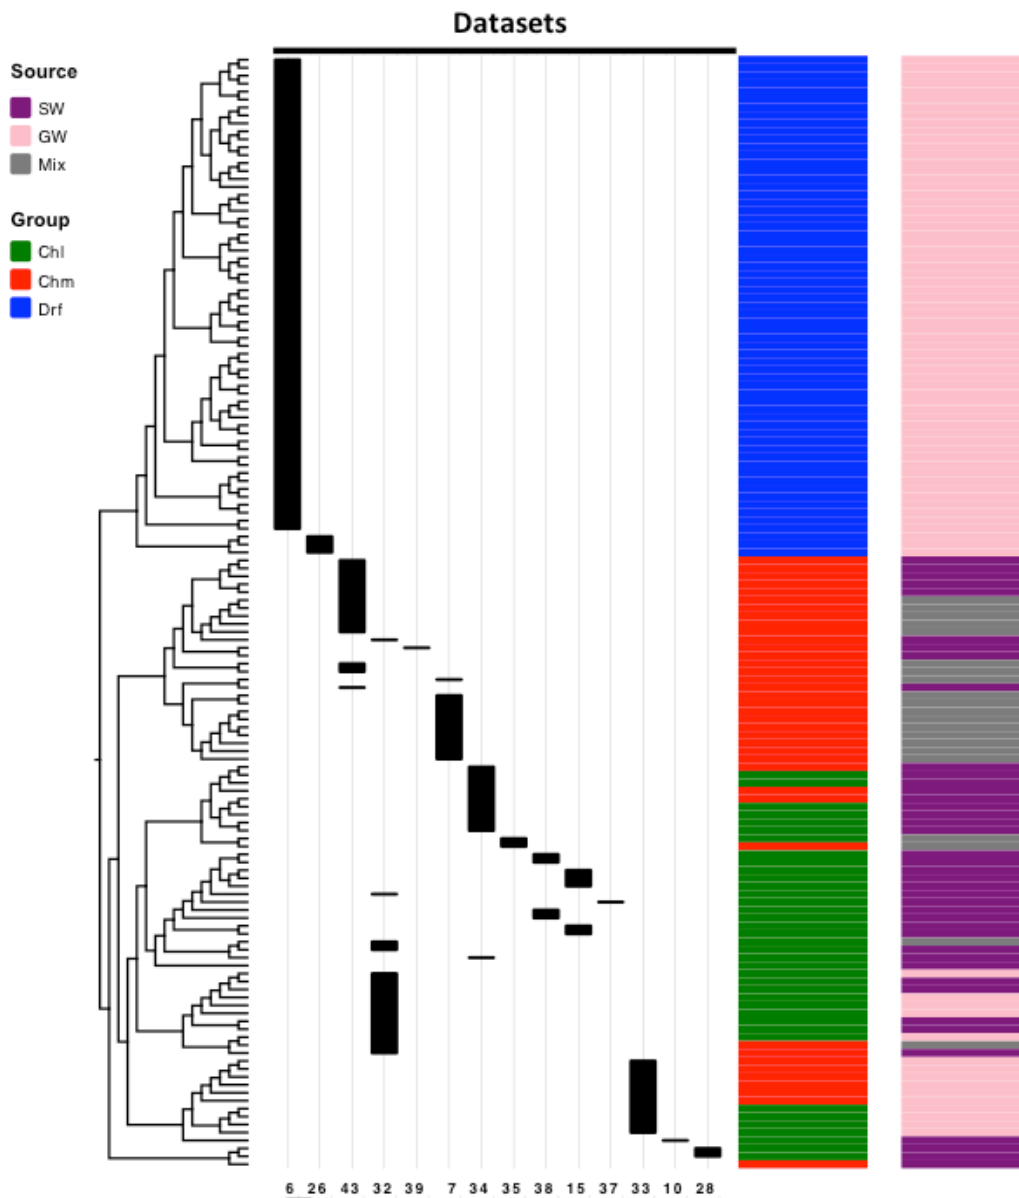

Supplement: c6ew00030d1.pdf [file c6ew00030d1.pdf]
